# Supplementary material for: Long branch attraction, taxon sampling, and the earliest angiosperms: Amborella or monocots?
Source: PubMed Central journal article supplement (PMC543456; doi:10.1186/1471-2148-4-35), 2004-09-28
Supplement: 1471-2148-4-35-S2.pdf [file 1471-2148-4-35-S2.pdf]

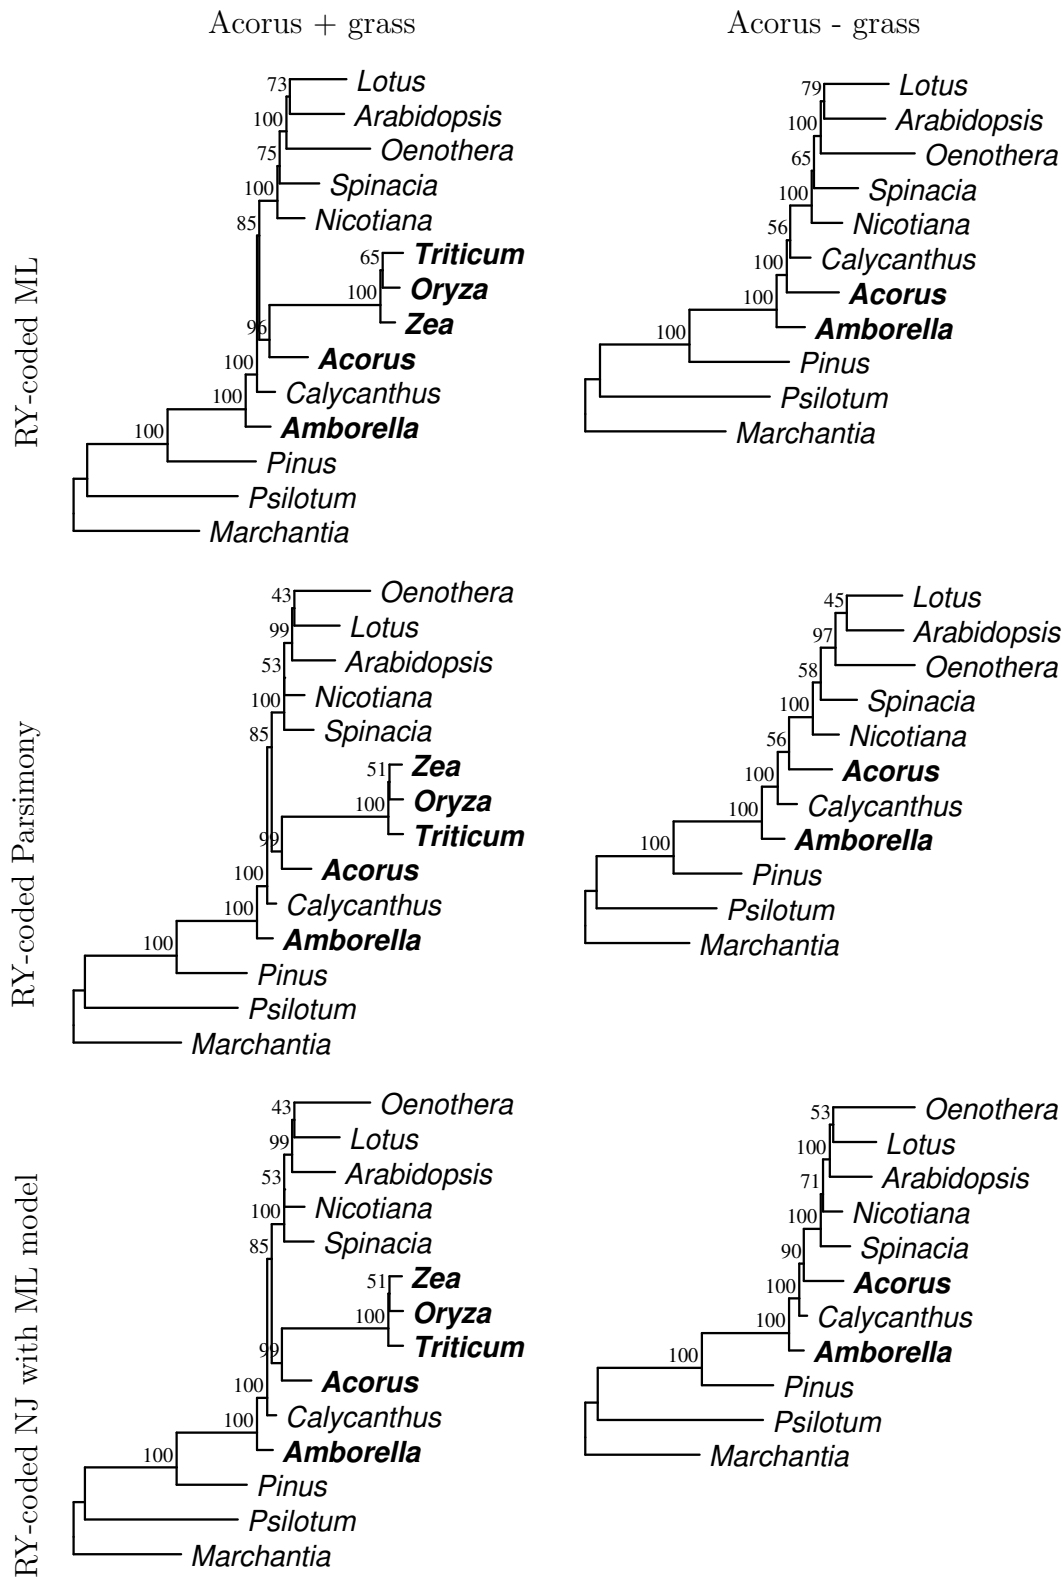

**Trees from truncated RY-coded matrix with *Acorus* included** This is the same analysis as in Additional file 1 except the DNA is RY-coded. For comparison, the corresponding BS values for the Amborella sister relationship in the full matrix, along each row, are: 1. (100 vs. 100, 100 vs. 100) 2. (98 vs. 100, 100 vs. 100) 3. (100 vs. 100, 100 vs. 100).
