# Supplementary material for: Long branch attraction, taxon sampling, and the earliest angiosperms: Amborella or monocots?
Source: PubMed Central journal article supplement (PMC543456; doi:10.1186/1471-2148-4-35), 2004-09-28
Supplement: 1471-2148-4-35-S3.pdf [file 1471-2148-4-35-S3.pdf]

2 rate categories

4 rate categories

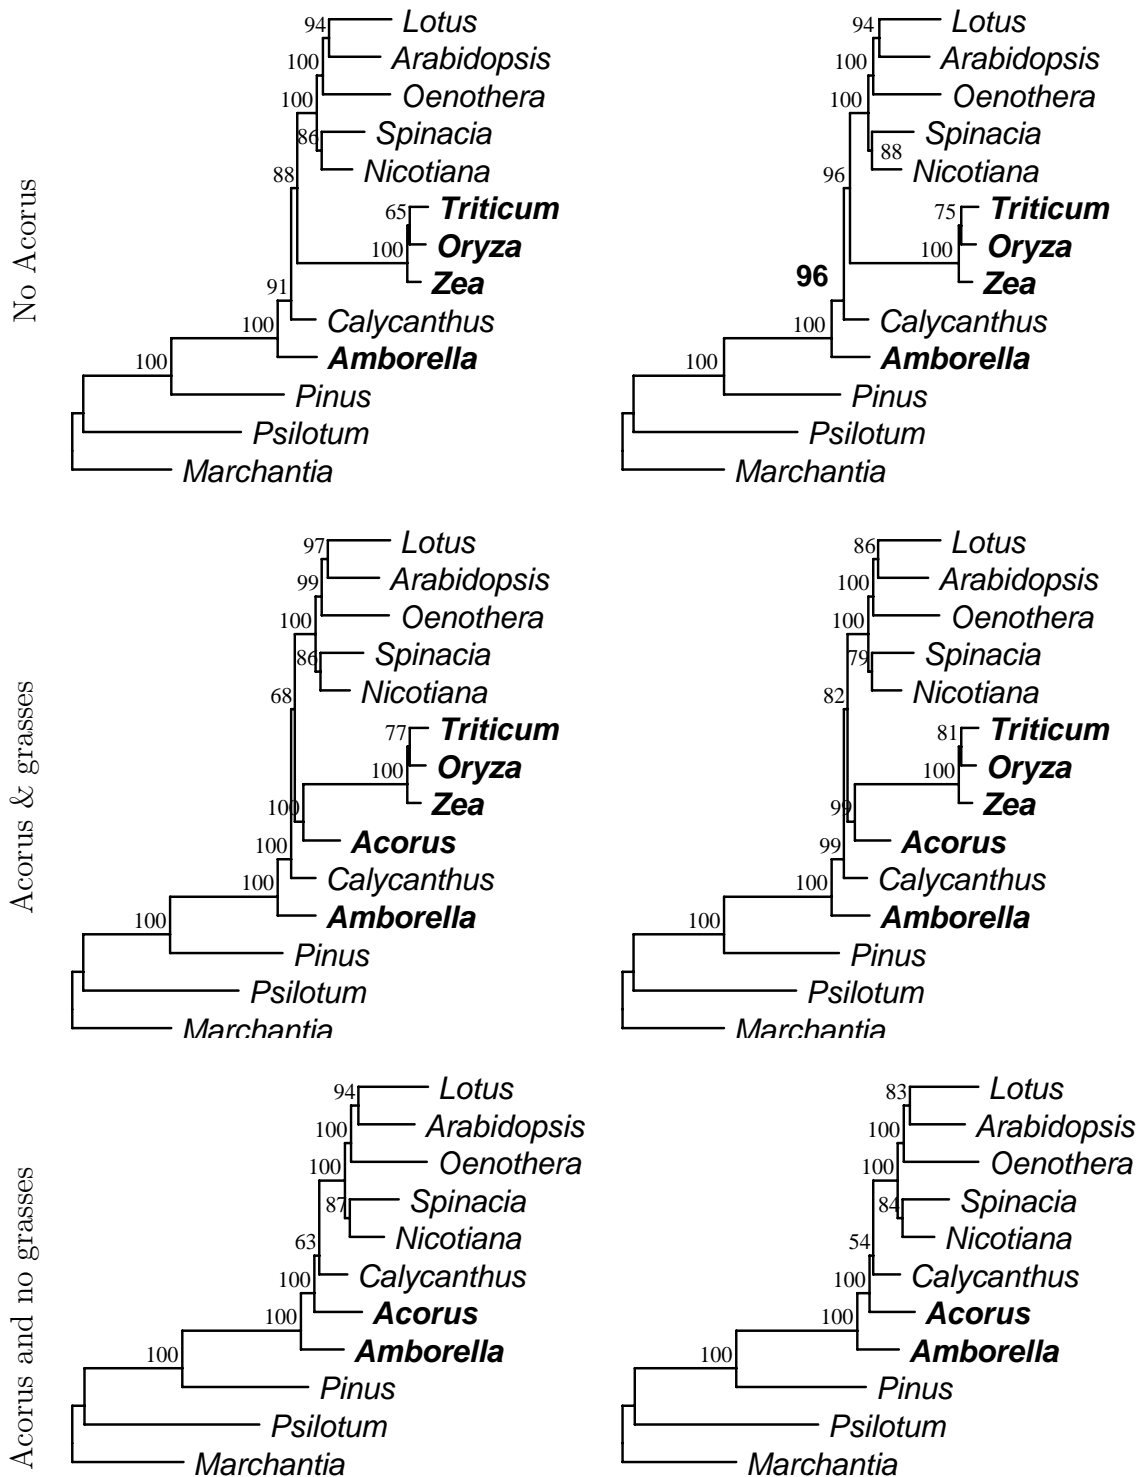

**Comparison of gamma distributed rates with 2 versus 4 rate categories:** This figure shows that using two rate categories gives essentially the same results as using four rate categories with this dataset. The dataset is the first- and second-position 61 gene matrix with either grasses, *Acorus*, or both used to represent monocots. The ML HKY85 model was used and parameters were estimated as described in Methods.
