# Supplementary material for: Long branch attraction, taxon sampling, and the earliest angiosperms: Amborella or monocots?
Source: PubMed Central journal article supplement (PMC543456; doi:10.1186/1471-2148-4-35), 2004-09-28
Supplement: 1471-2148-4-35-S4.pdf [file 1471-2148-4-35-S4.pdf]

A

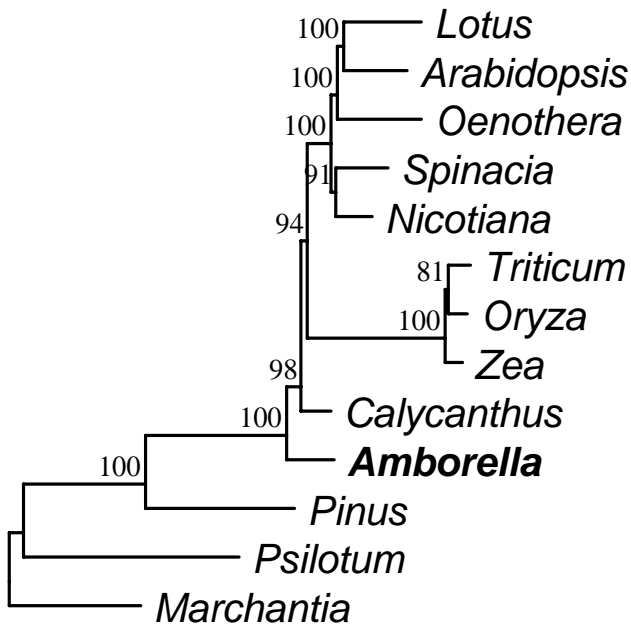

B

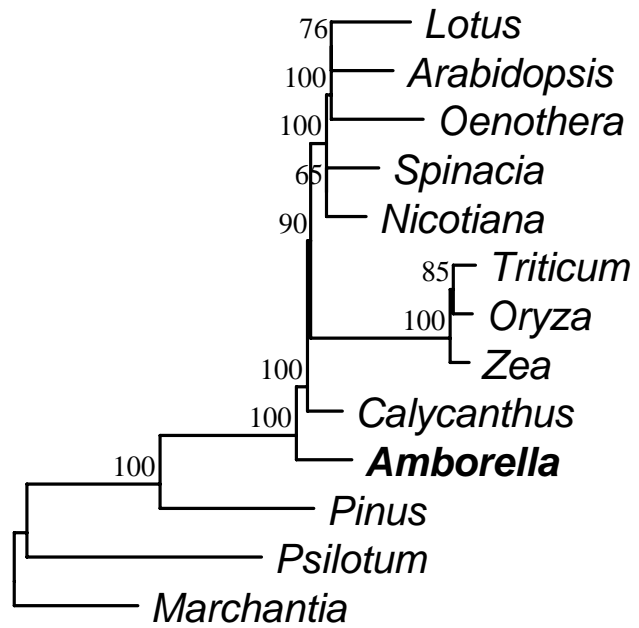

Trees when constant sites are removed from the 1st and 2nd position alignment of Goremykin et al. 2003

A. ML HKY85 and equal rates.

B. NJ with distances calculated using an ML HKY85 model and equal rates
