# Supplementary material for: Long branch attraction, taxon sampling, and the earliest angiosperms: Amborella or monocots?
Source: PubMed Central journal article supplement (PMC543456; doi:10.1186/1471-2148-4-35), 2004-09-28
Supplement: 1471-2148-4-35-S5.pdf [file 1471-2148-4-35-S5.pdf]

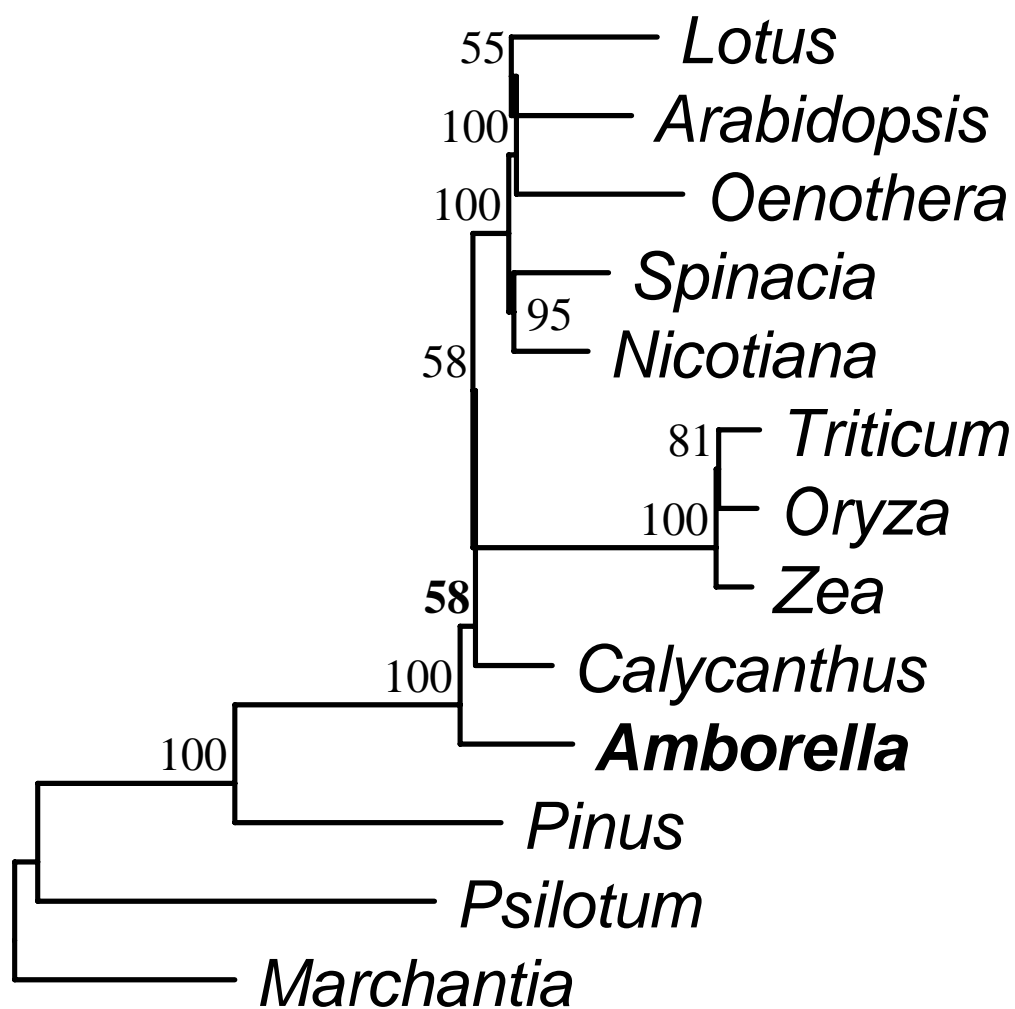

**NJ analysis with ML proportion invariant distances** Distances were calculated using the ML HKY85 model and estimated proportion of invariant sites. The first- and second-position matrix of Goremykin et al. 2003.
