# Supplementary material for: Long branch attraction, taxon sampling, and the earliest angiosperms: Amborella or monocots?
Source: PubMed Central journal article supplement (PMC543456; doi:10.1186/1471-2148-4-35), 2004-09-28
Supplement: 1471-2148-4-35-S6.pdf [file 1471-2148-4-35-S6.pdf]

A

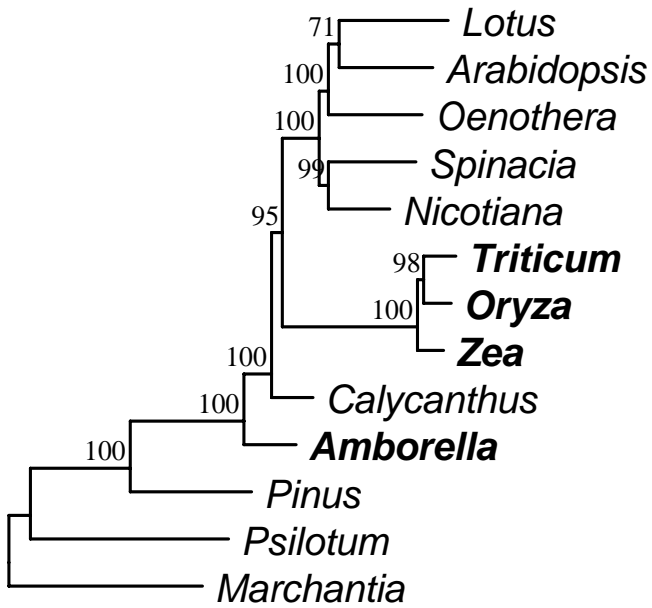

B

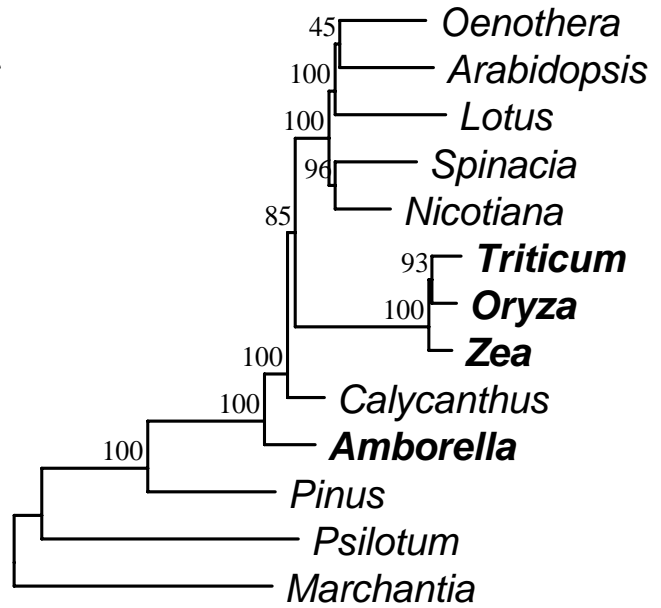

ML trees using third positions only

A. HKY85 model with equal rates.

B. HKY85 model with gamma rates and 4 rate categories
