# Supplementary material for: Long branch attraction, taxon sampling, and the earliest angiosperms: Amborella or monocots?
Source: PubMed Central journal article supplement (PMC543456; doi:10.1186/1471-2148-4-35), 2004-09-28
Supplement: 1471-2148-4-35-S7.pdf [file 1471-2148-4-35-S7.pdf]

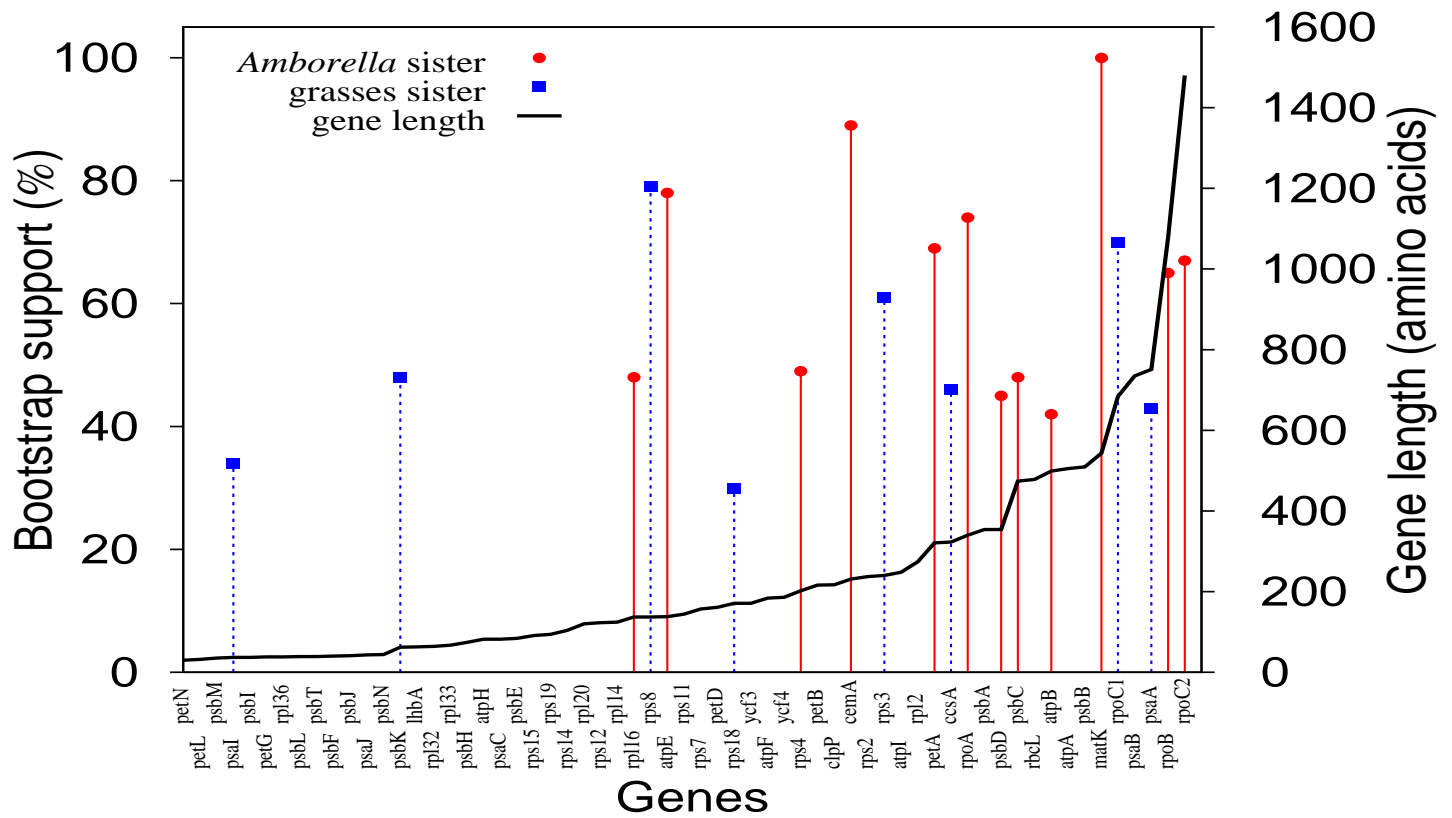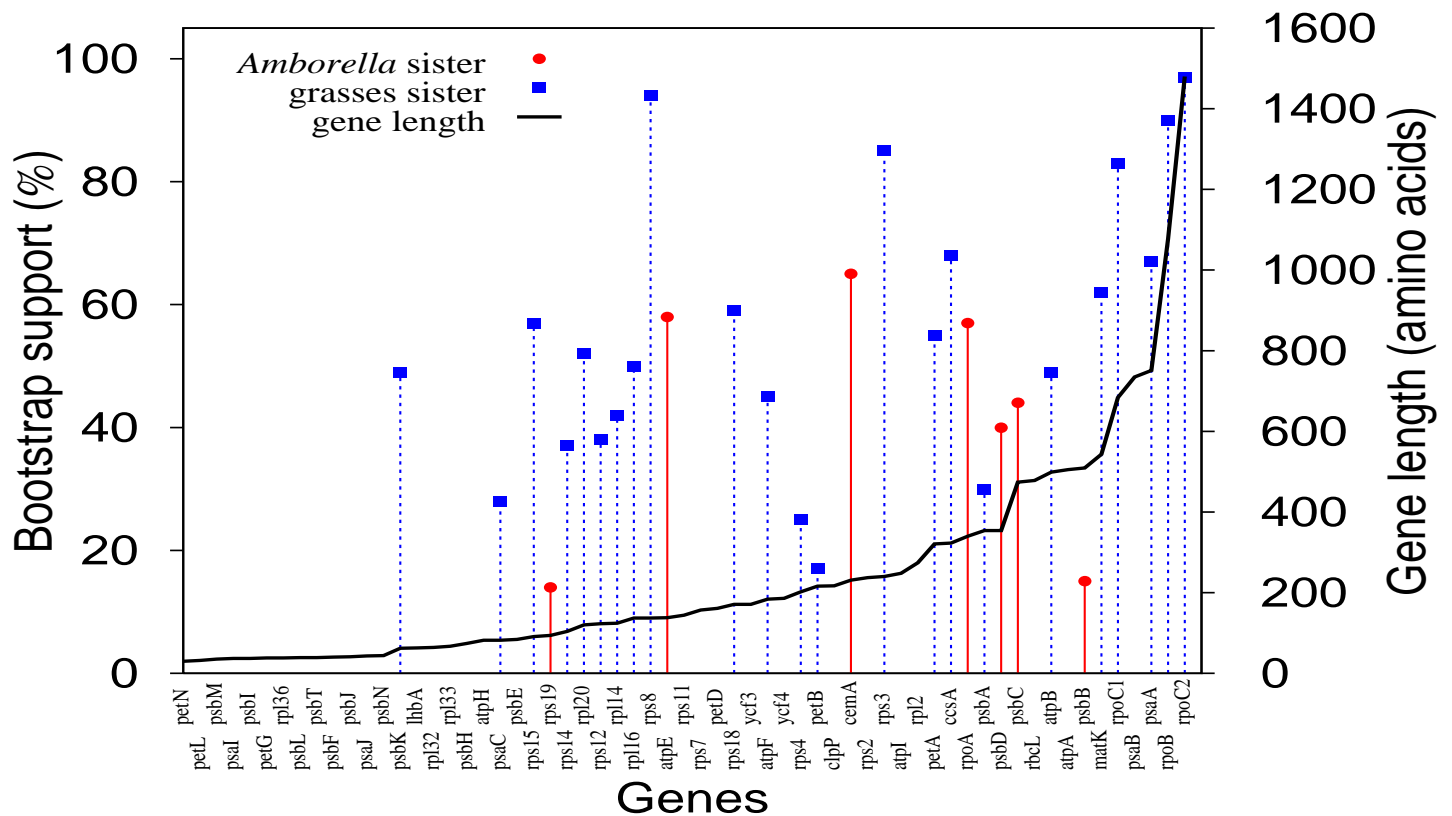

Sister group to the rest of angiosperms found in individual gene analyses using first- and second-position data without *Acorus*

Top: ML HKY85 with four gamma distributed rates  
 Bottom: Parsimony analysis
