# Supplementary material for: Long branch attraction, taxon sampling, and the earliest angiosperms: Amborella or monocots?
Source: PubMed Central journal article supplement (PMC543456; doi:10.1186/1471-2148-4-35), 2004-09-28
Supplement: 1471-2148-4-35-S10.pdf [file 1471-2148-4-35-S10.pdf]

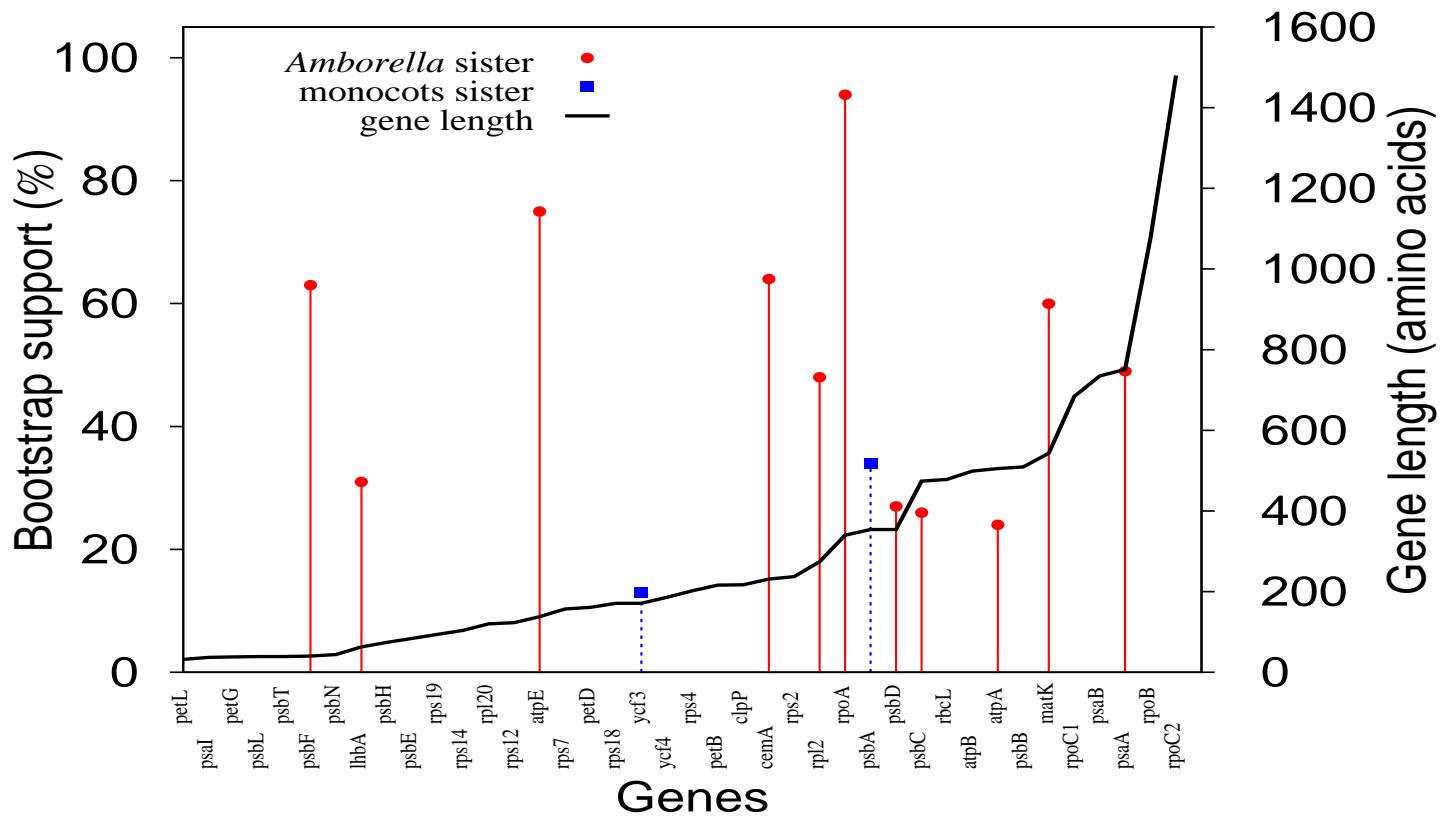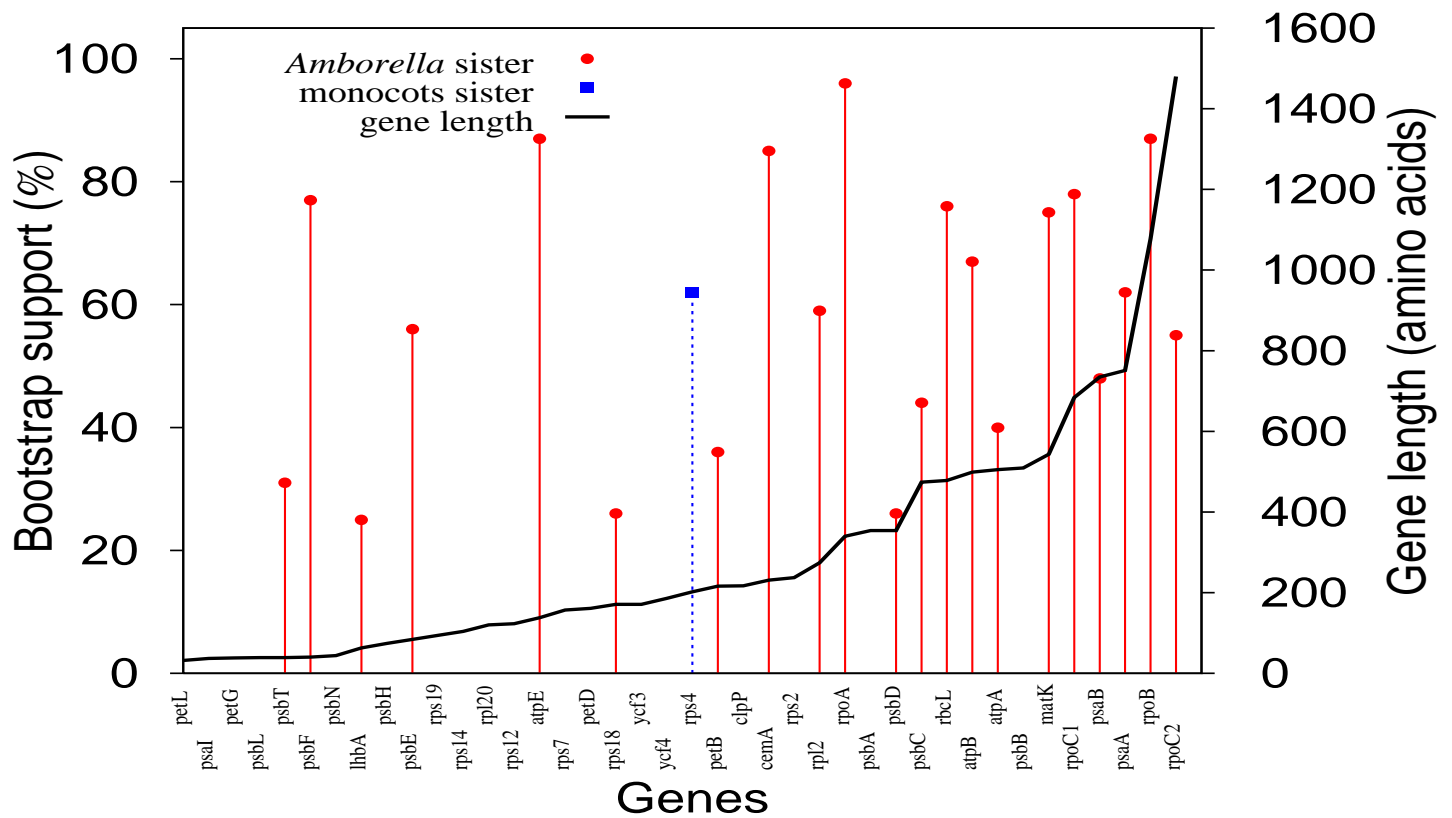

Sister group to the rest of angiosperms found in individual gene analyses using parsimony on all 3 positions

Top: *Acorus* added

Bottom: *Acorus* added minus grasses
