# Supplementary material for: Long branch attraction, taxon sampling, and the earliest angiosperms: Amborella or monocots?
Source: Springer Nature journal article supplement (doi:10.1186/1471-2148-4-35), 2004-09-28
Supplement: Additional file 10 [file 1471-2148-4-35-s10.pdf]

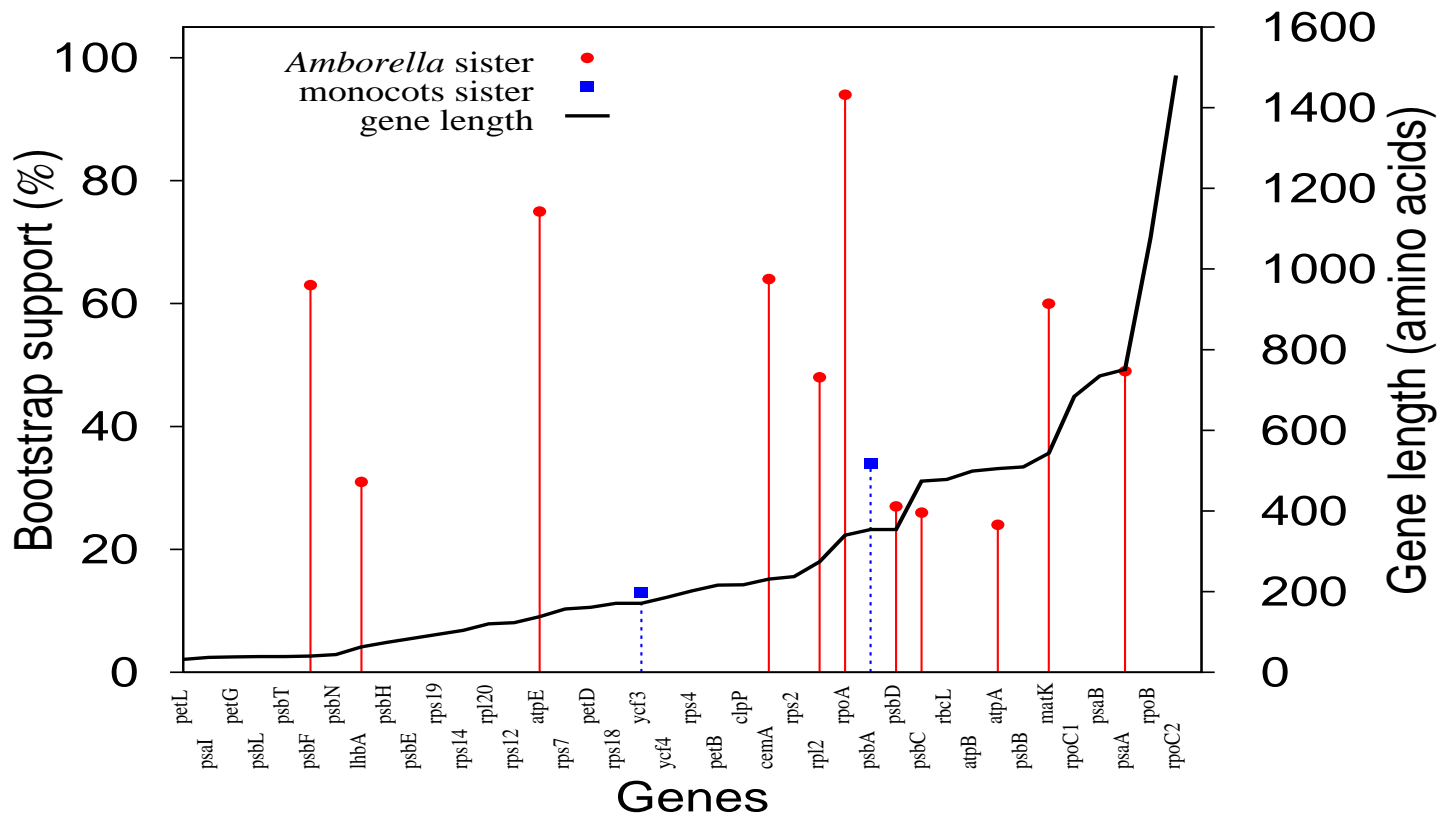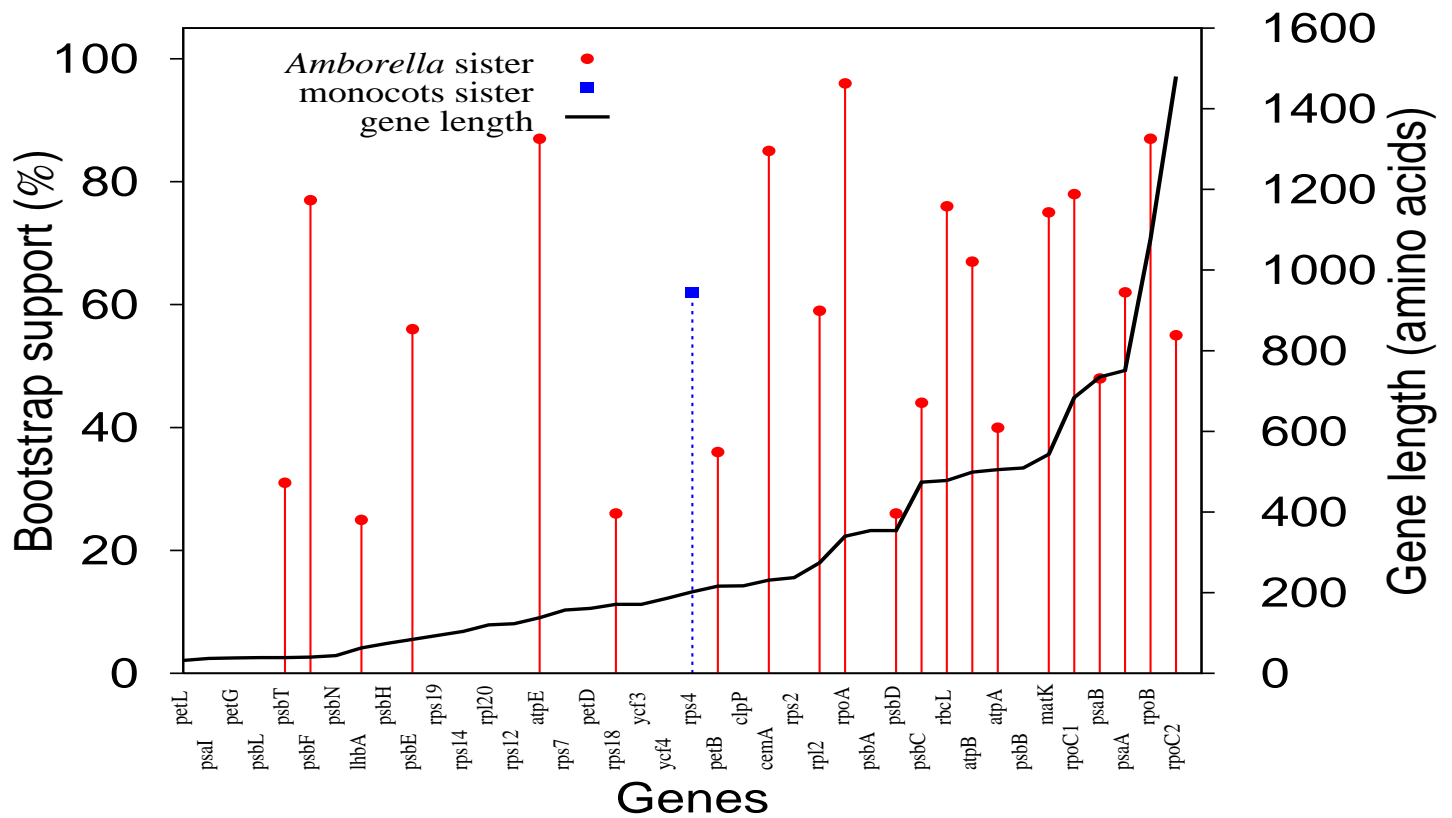

Sister group to the rest of angiosperms found in individual gene analyses using parsimony on all 3 positions

Top: *Acorus* added

Bottom: *Acorus* added minus grasses
